# Supplementary material for: Genome-Wide Extrachromosomal Circular DNA Profiling of Paired Hepatocellular Carcinoma and Adjacent Liver Tissues
Source: MDPI journal article supplement (doi:10.3390/cancers15225309), 2023-11-07
Supplement: s1 [file s1]

# **Supplementary Materials for**

## **Genome-wide extrachromosomal circular DNA profiling of paired hepatocellular carcinoma and adjacent liver tissues**

**Jianyu Ye <sup>1#</sup>, Peixin Huang <sup>2,3#</sup>, Kewei Ma <sup>1</sup>, Zixin Zhao <sup>1</sup>, Ting Hua <sup>1</sup>, Wenjing Zai <sup>1</sup>, Jieliang Chen <sup>1\*</sup> and Xiutao Fu <sup>2,4,5\*</sup>**

<sup>1</sup> Key Laboratory of Medical Molecular Virology (MOE & NHC), Research Unit of Cure of Chronic Hepatitis B Virus Infection (CAMS), School of Basic Medical Sciences, Shanghai Medical College Fudan University, Shanghai 200032, China

<sup>2</sup> Liver Cancer Institute, Fudan University, Shanghai 200032, China

<sup>3</sup> Department of Hepatic Oncology, Zhongshan Hospital, Fudan University, Shanghai 200032, China

<sup>4</sup> Department of Liver Surgery and Transplantation, Zhongshan Hospital, Fudan University Shanghai 200032, China

<sup>5</sup> Key Laboratory of Carcinogenesis and Cancer Invasion (Ministry of Education), Shanghai 200032, China

# These authors contributed equally to this work.

\* Correspondence to: jieliangchen@fudan.edu.cn (J. C.); fu.xiutao@zs-hospital.sh.cn (X. F.)

## Supplementary S1: R code for the main figures

Figure 1B

```
ggplot(v3,mapping = aes(x = group,y=`Circle length(bp)`,fill=group),)+  
  geom_violin()+  
  theme_classic()+  
  theme(text = element_text(size=16,family = "sans"))+  
  scale_y_log10(breaks = c(10, 100, 1000,10000,100000),  
    label = c("10", "100", "1000", "10000", "100000"))
```

Figure 1C

```
ggplot(NT,aes(x=log10(`Circle length (bp)`),color=group,fill=group))+  
  geom_density(alpha=0.5)+  
  theme_classic()+  
  labs( y= "Estimated density",x="Circle Length", size=10)+  
  theme(text = element_text(family = "sans",  
    size=16))+  
  scale_x_continuous(breaks = c(1,2,3,4,5),  
    labels = c("10", "100", "1000", "10000", "100000"))+  
  scale_y_continuous(breaks = c(0,0.5,1,1.5,2),  
    labels = c("0", "0.05", "0.1", "0.15", "0.2"))
```

Figure 1D

```
ggplot(EccList_byindividual)+  
  geom_bar(aes(x=sample_list,y=copies,fill=group),width = 0.5,stat = 'identity')+  
  theme_classic()+  
  theme(text = element_text(size=16,family = "sans"))+  
  scale_x_discrete(labels = c("copies of eccDNA1" = "Nitrogen rate1"))+  
  theme(text = element_text(size=16,family = "sans"))+  
  scale_y_log10(breaks = c(100,1000,10000,100000),  
    labels = c('100','1000','10000','100000'))+  
  coord_cartesian(ylim = c(100,100000 ))+  
  ylab("Detected eccDNA")+  
  xlab("")
```

Figure 2A

```
plot.params <- getDefaultPlotParams(plot.type=2)  
plot.params$ideogramheight <- 80  
kp <- plotKaryotype(genome="hg38", plot.type=2,plot.params = plot.params)  
kpDataBackground(kp, data.panel = 1, r0=0.1, r1=0.7)  
kpDataBackground(kp, data.panel = 1, r0=0.8, r1=1.4)  
kpAxis(kp, ymin=2, ymax=8, r0=0.2, r1=0.8, col="gray50", numticks=2,cex=0.5,text.col = 'white')  
kpAxis(kp, ymin=2, ymax=8, r0=0.9, r1=1.5, col="gray50", numticks=2,cex=0.5,text.col = 'white')  
kpBars(kp, chr=Norm_sum$chr, x0=Norm_sum$start, x1=Norm_sum$end, y1 =  
  Norm_sum$norm_copy_number,  
  ymin=2, ymax=8, r0=0.2, r1=0.8, data.panel = 1, border="#F8766D" )  
kpBars(kp, chr=Tumor_sum$chr, x0=Tumor_sum$start, x1=Tumor_sum$end, y1 =  
  Tumor_sum$norm_copy_number,  
  col="#AADDAA", ymin=2, ymax=8, r0=0.9, r1=1.5, data.panel = 1, border="#00BFC4" )  
legend(x = "bottomright", fill = c("#F8766D", "#00BFC4"), legend = c("Norm", "Tumor"),box.col="white")
```

Figure 2B

```
anno_Tumor_2 <- annotatePeak(Tumor,tssRegion = c(-500,500),
```

```

TxDb = TxDb.Hsapiens.UCSC.hg38.knownGene)
plotAnnoPie(anno_Tumor_2,ndigit=1)
anno_norm_2 <- annotatePeak(Norm,tssRegion = c(-500,500),
TxDb = TxDb.Hsapiens.UCSC.hg38.knownGene)
plotAnnoPie(anno_norm_2,ndigit=1)

```

Figure 2C

```

plotAnnoBar(list_all,ndigit=1)+
  theme(text = element_text(size=16,family = "sans"))

```

Figure 2D

```

plotPeakProf2(peak = list(Norm,Tumor), upstream = rel(0.2), downstream = rel(0.2),
  by = "gene", type = "body", nbins = 800,
  TxDb = TxDb.Hsapiens.UCSC.hg38.knownGene, weightCol = "V5",ignore_strand = T,
  ylab = "eccDNA Read Count Frequency",conf = 1)+
  theme(text = element_text(size=16,family = "sans"))

```

Figure 3A

```

ggplot(NT,aes(y=counts_per_Mb,x=V1,fill=group))+
  geom_bar(stat = 'identity', position = 'dodge')+
  theme_classic()+
  ylab("counts per Mb")+
  scale_y_continuous(expand = c(0,0),limits = c(0,500),
    sec.axis = sec_axis(~./12,
      name = 'Protein coding gene density / Mb',
      breaks = seq(0,40,10)))+
  geom_line(mapping = aes(x= V1,
    y= V2*12),
    linetype=3,cex=0.5,group=1)+
  geom_point(mapping = aes(x= V1,
    y= V2*12),
    color='black',size=2)

```

Figure 4

Mainly following tutorial

<https://www.bioconductor.org/packages/release/workflows/vignettes/rnaseqGene/inst/doc/rnaseqGene.R>

Figure 5A

```

plot.params <- getDefaultPlotParams(plot.type=2)
plot.params$ideogramheight <- 10
kp <- plotKaryotype(genome="hg38", plot.type=2,plot.params = plot.params,chromosomes = c("chr22"))
kpAddCytobandLabels(kp, cex=0.5, force.all=TRUE)
kpPlotDensity(kp,data = gr0>window.size = 1e6,r0=0.15, r1=0,data.panel=2,ymin = 0,ymax = 60)
kpAxis(kp, data.panel = 2, ymin=0, ymax=40, r0=0.15, r1=0, col="gray50", numticks=3,cex=0.8,text.col =
'black',labels = c(0,30,60))
for (i in 1:length(sample_list)) {
  kpPlotDensity(kp,data = Eccgr[[i]],window.size = 1e6,r0=0.02+(i-1)*0.08,
r1=0.02+i*0.08,data.panel=1,ymin = 0,ymax = 100000,col=Ecc_color[i])
  kpAxis(kp, ymin=0, ymax=8, r0=0.02+(i-1)*0.08, r1=0.02+i*0.08, col="gray50",
numticks=2,cex=0.5,text.col = 'white')
  kpAddLabels(kp, sample_list_1[i], label.margin=0.01, side="left", offset=0, r0=0.02+(i-1)*0.08,
r1=0.02+i*0.08)
}

```

```

for (i in 1:length(Ecclist)) {
  Ecclist_chr20[[i]] <- Ecclist[[i]] %>%
    filter(V1=='chr22') %>%
    select(c(1:3,5)) %>%
    mutate(copy_number=log2(V5)) %>%
    mutate(norm_copy_number=copy_number) %>%
    `colnames<-`(c('chr','start','end','splite_read','copy_number','norm_number'))
  kpBars(kp, chr=Ecclist_chr20[[i]]$chr, x0=Ecclist_chr20[[i]]$start, x1=Ecclist_chr20[[i]]$end,
    y1 = Ecclist_chr20[[i]]$norm_number,
    ymin=0, ymax=8, r0=1.55-(i-1)*0.08, r1=1.55-i*0.08, data.panel = 2, border=Ecc_color[i])
  kpAxis(kp, ymin=0, ymax=8, r0=1.55-(i-1)*0.08, r1=1.55-i*0.08, col="gray50", numticks=2,cex=0.5,text.col
= 'white',data.panel = 2)
  kpAddLabels(kp, sample_list_1[i], label.margin=0.01, side="left", offset=0, r0=1.55-(i-1)*0.08, r1=1.55-
i*0.08,data.panel = 2)
}

```

Figure 6A

```

upset(Ecclist_bygene_full_over3,
  sets = c('Ecc_22T',
    'Ecc_24T',
    'Ecc_28T',
    'Ecc_50T',
    'Ecc_77T',
    'Ecc_80T',
    'Ecc_81T',
    'Ecc_83T'),
  mainbar.y.label = "Genes in common",
  mb.ratio = c(0.65, 0.35),
  sets.x.label = "Gene Counts",
  matrix.color = "gray23",
  sets.bar.color = "#00BFC4",
  main.bar.color = "#00BFC4",
  text.scale=c(2,2,2,2,1.6,2))

```

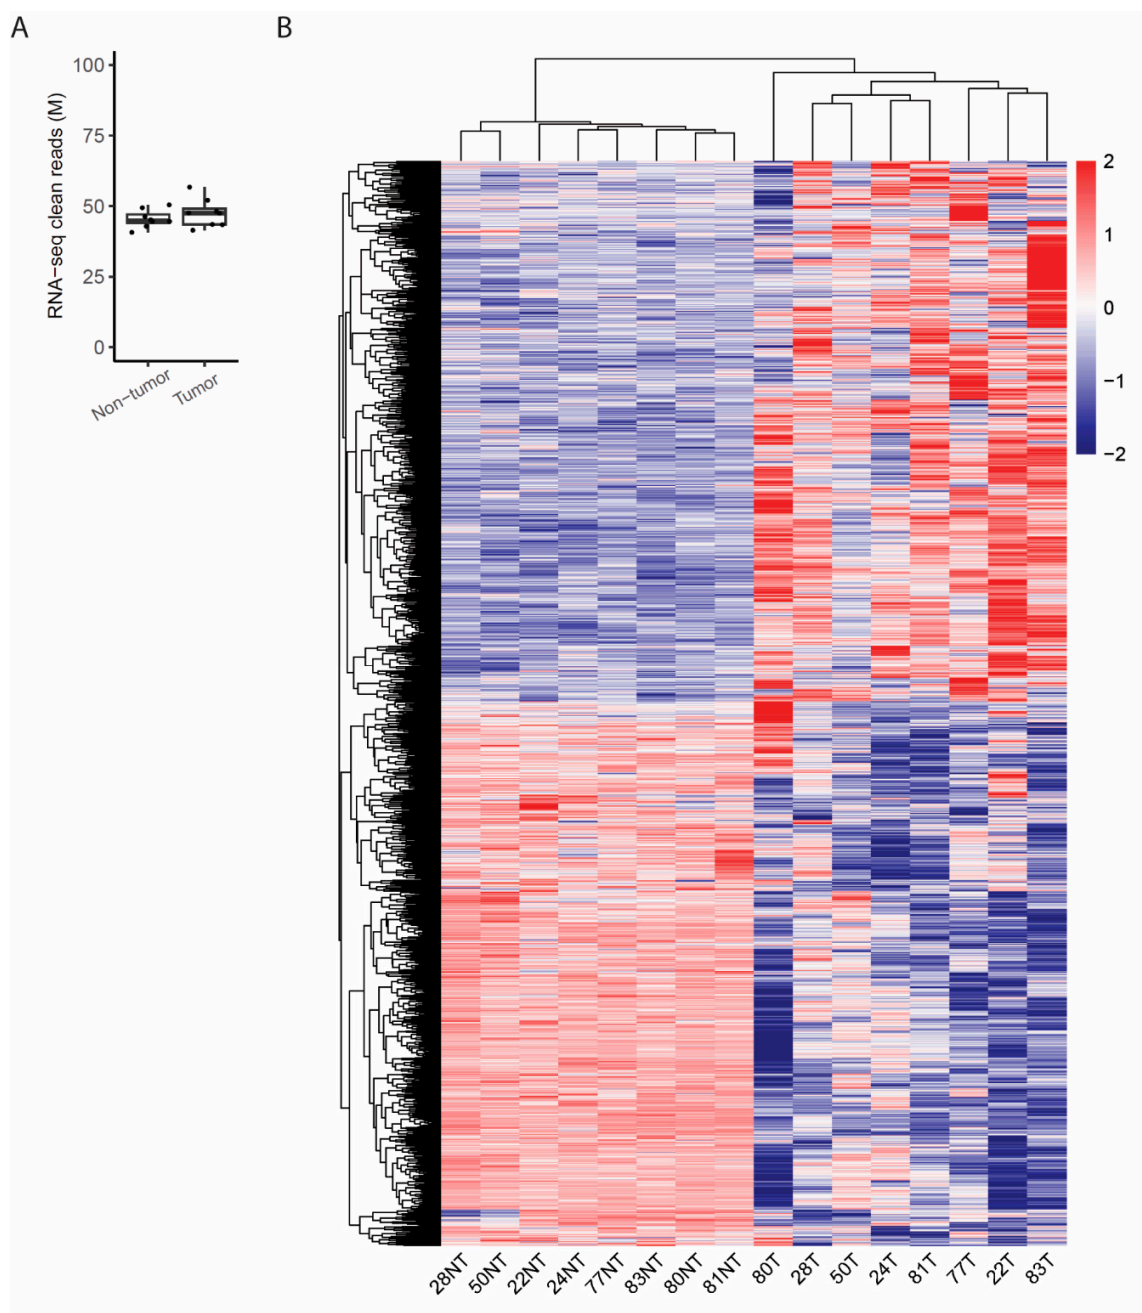

**Figure S1.** (A) QC passed reads in HCC and the adjacent non-tumor tissues. (B) The heatmap of significantly differential expressed genes (Fold change >2, FDR q value < 0.05, t test) in HCC tissue and the adjacent non-tumor tissue.

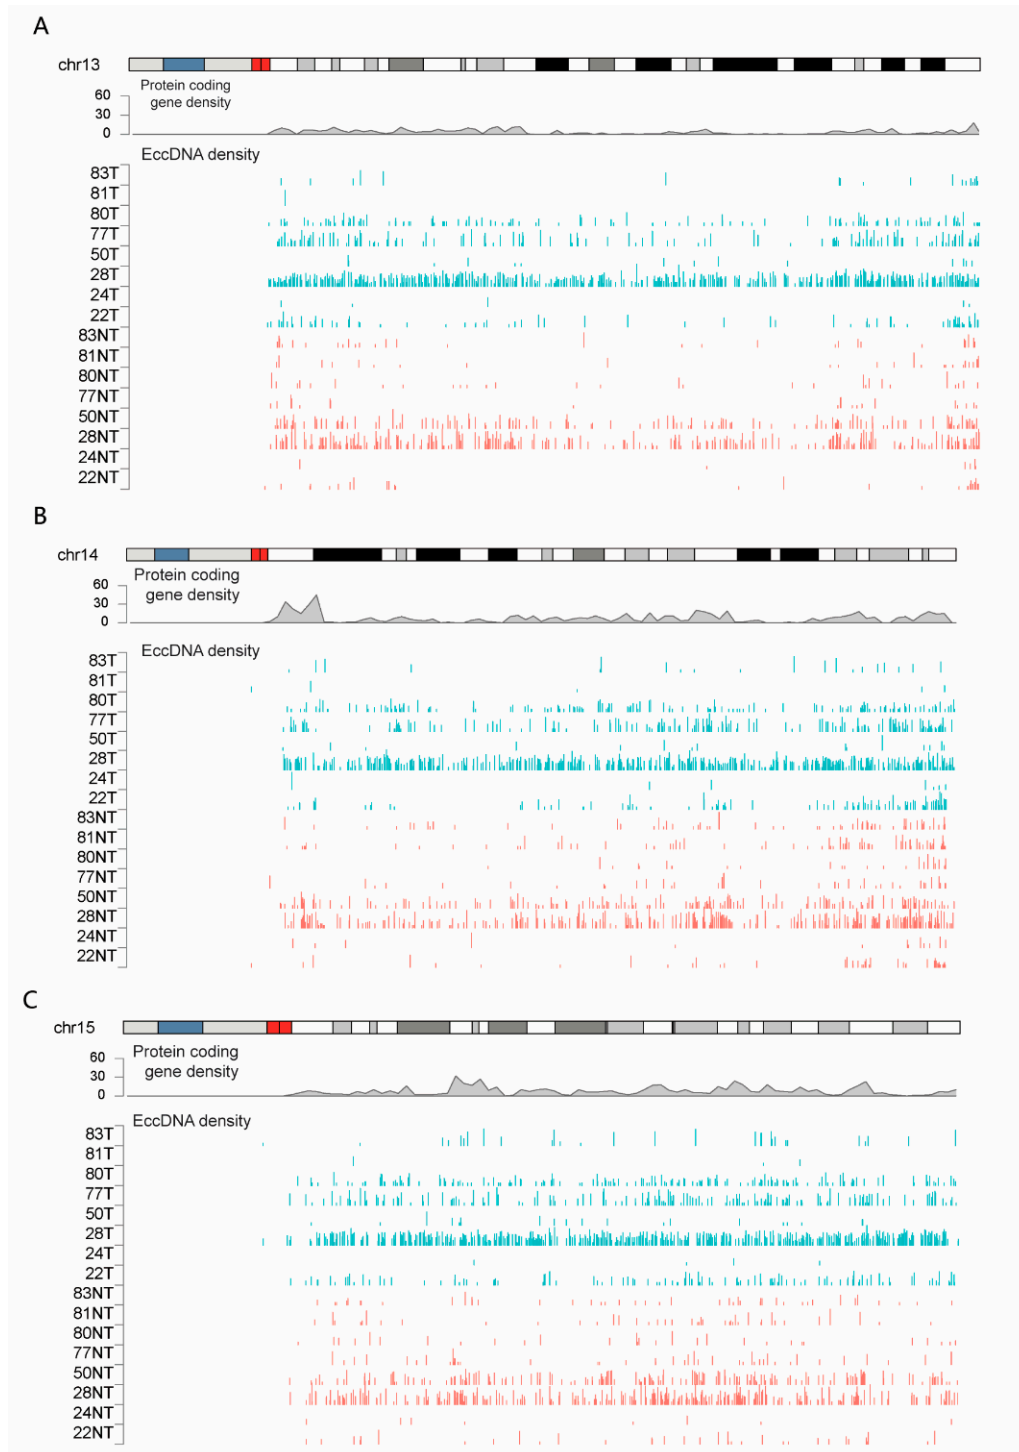

**Figure S2.** Protein coding genes (upper panel) were grouped into bins of 1-Mb step-wise across chromosome 13, 14,15 (A-C). EccDNAs clustering patterns (lower panel) were similar with that of protein coding gene patterns across all samples.

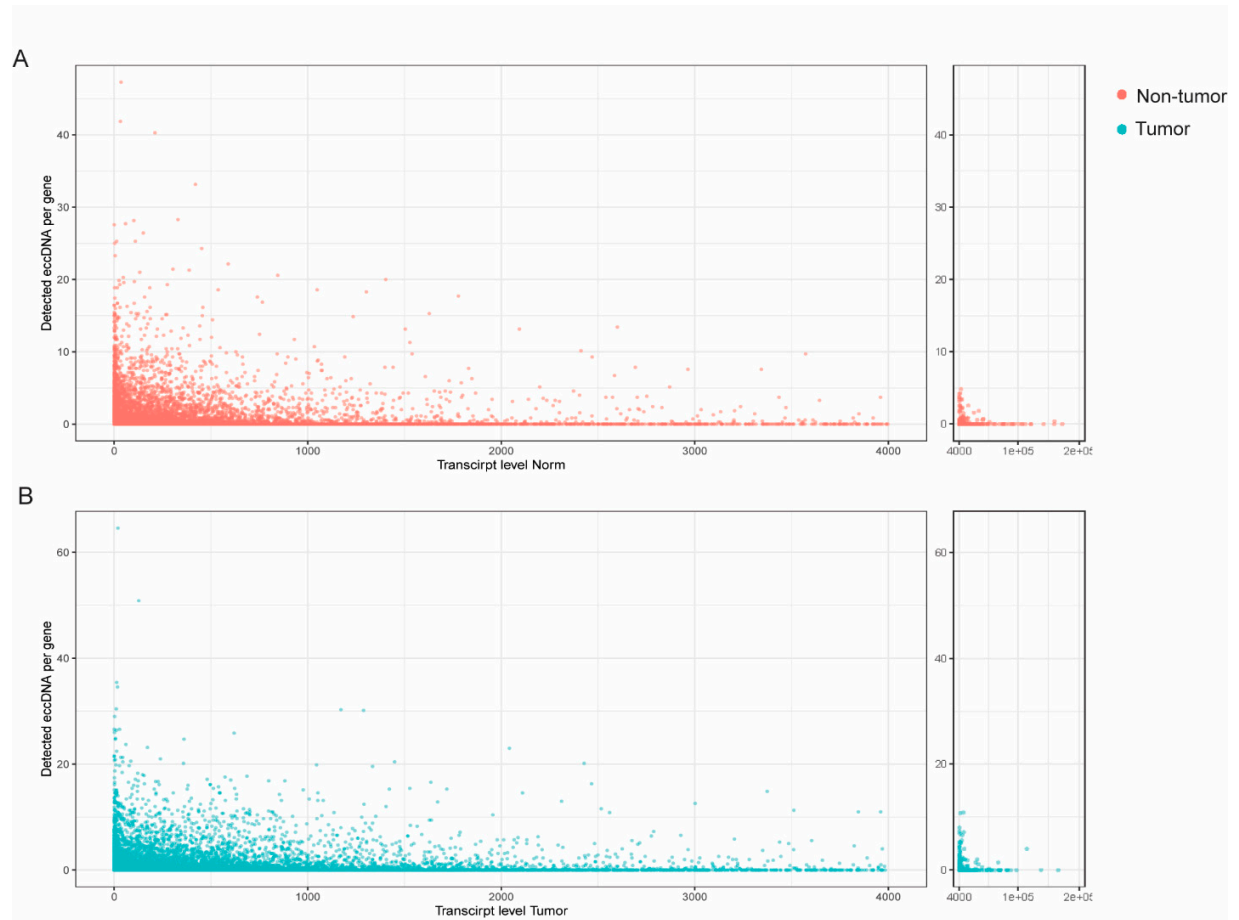

**Figure S3.** The relation analysis of the eccDNA counts per gene and the average transcription level of the eight HCC and adjacent tissue samples.

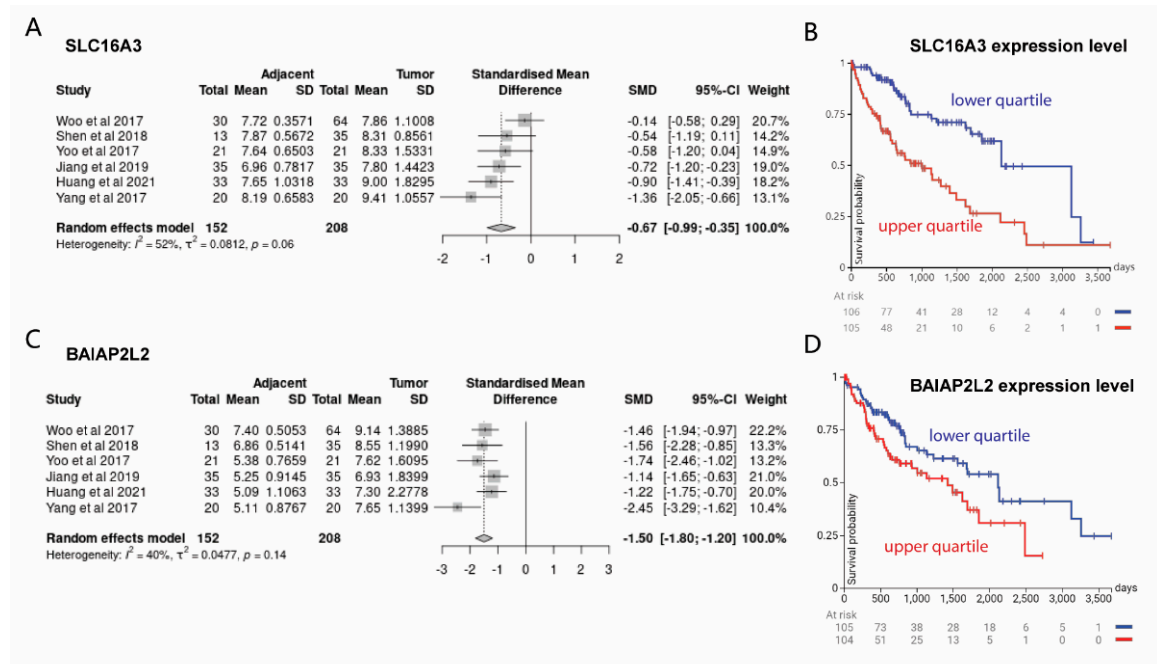

**Figure S4.** Two genes related to eccDNA showed higher expression levels and are associated with lower survival rates in public HCC cohorts. (A, C) Meta-analysis. Published microarray and RNA-seq data were downloaded from Gene Expression Omnibus (GEO), including accession numbers GSE76311 (1) and GSE89377 (2), as well as Bioproject, including accession numbers PRJNA310654 (3), PRJNA371753 (4), PRJNA512451 (5) and PRJNA762641 (6). We used limma (v3.46.0) to process microarray data following the standard procedure (7). After calculation of the logarithmic ratio of the gene expression level between tumor tissue and non-tumor tissue as well as its standard error for each viable study, we used the DerSimonian-Laird random effects model to perform the meta-analysis using R packages meta (v5.2-0) (8). We selected the random effects model a priori, as we expected significant study heterogeneity. Gene expression levels were combined using a random effects model. The size of each square represents the weight of that study. Microarray-derived and high-throughput sequencing gene expression levels in tumors tissues versus adjacent non-tumor liver tissues were shown. The results indicated that the standardized mean differences (SMDs) between tumor and non-tumor samples were -1.08 (95% CI -0.99 ~ -0.35) and -1.20 (95% CI -1.80 ~ -1.20) for SLC16A3 and BAIAP2L2, respectively. (B, D) Kaplan-Meier analysis comparing HCC patient survival rates with different gene expression levels in TCGA cohort. Patient survival plot was drawn based on the information summarized by the UCSC Xena (<http://xena.ucsc.edu/>) database. We used the GDC TCGA Liver Cancer (LIHC) project data and divided samples into two groups based on gene expression in quartiles. Two indicated genes including SLC16A3 and BAIAP2L2, showed higher expression levels and were associated with lower survival rates in HCC.



**Supplementary Table S1: Clinical annotation of patients analyzed with Circle-seq and RNA-seq.**

| Patient ID | Age | Sex    | Tissue | BCLC | CNLC | Serum HBsAg |
|------------|-----|--------|--------|------|------|-------------|
| #22        | 66  | Male   | T/NT   | A    | Ib   | (+)         |
| #24        | 70  | Male   | T/NT   | A    | Ib   | (-)         |
| #28        | 67  | Male   | T/NT   | A    | Ia   | (+)         |
| #50        | 61  | Male   | T/NT   | A    | Ib   | (+)         |
| #77        | 65  | Female | T/NT   | B    | IIb  | (+)         |
| #80        | 56  | Male   | T/NT   | A    | Ia   | (-)         |
| #81        | 56  | Male   | T/NT   | A    | Ib   | (+)         |
| #83        | 67  | Male   | T/NT   | A    | Ib   | (+)         |

**Supplementary Table S2: Primers used for PCR and Sanger DNA sequencing**

| Name            | Description                     | Sequence (5'-3')          |
|-----------------|---------------------------------|---------------------------|
| #83T_BAIAP2L2-F | PCR of circle junction in #83 T | ACCCATCTCTGGGCCTCAGT      |
| #83T_BAIAP2L2-R | PCR of circle junction in #83 T | GGCAACTTGTCCAAAGTCACAAAGC |

**Supplementary Table S3: All eccDNAs identified in at least two or more tissues in the eight adjacent tissues**

| chrom | start     | end       | length (bp) | meancov                 | sample               |
|-------|-----------|-----------|-------------|-------------------------|----------------------|
| chr11 | 64582047  | 64582240  | 194         | 16.3;13.1;              | 50NT;83NT;           |
| chr12 | 120707029 | 120707224 | 196         | 150.6;194.7;            | 22NT;80NT;           |
| chr12 | 131098129 | 131098188 | 60          | 16.3;8.6;               | 28NT;50NT;           |
| chr1  | 228547392 | 228548604 | 1213        | 14.4;63.3;              | 22NT;80NT;           |
| chr12 | 49877510  | 49877621  | 112         | 4.8;60.4;               | 28NT;77NT;           |
| chr1  | 55002911  | 55003057  | 147         | 146.6;65.4;             | 22NT;77NT;           |
| chr15 | 75104289  | 75104508  | 220         | 29.7;18.4;              | 28NT;50NT;           |
| chr17 | 41632758  | 41633278  | 521         | 65.2;77.8;              | 24NT;80NT;           |
| chr17 | 80024304  | 80024653  | 350         | 72.6;46.3;40.2;         | 24NT;77NT;83NT;      |
| chr20 | 43696476  | 43697013  | 538         | 13.1;117.3;             | 22NT;83NT;           |
| chr3  | 195110258 | 195110895 | 638         | 23.0;215.6;             | 22NT;77NT;           |
| chr9  | 43333269  | 43334072  | 804         | 196.6;470.0;357.1;75.3; | 22NT;77NT;80NT;83NT; |
| chr9  | 76230379  | 76230727  | 349         | 7.9;9.0;                | 28NT;50NT;           |
| chrY  | 10670737  | 10674059  | 3323        | 615.0;315.6;            | 50NT;80NT;           |
| chrY  | 11048306  | 11048620  | 315         | 47.6;32.7;              | 22NT;81NT;           |

**Supplementary Table S4: All eccDNAs identified in at least two or more tissues in the eight HCC tissues**

| chrom | start     | end       | length (bp) | meancov          | sample       |
|-------|-----------|-----------|-------------|------------------|--------------|
| chr10 | 131176467 | 131177157 | 691         | 76.9;63.2;       | 77T;80T;     |
| chr11 | 132125730 | 132125790 | 61          | 232.8;54.1;68.5; | 22T;77T;80T; |
| chr12 | 49877510  | 49877621  | 112         | 28.8;47.0;       | 77T;80T;     |
| chr1  | 30488722  | 30488829  | 108         | 41.3;32.7;       | 77T;80T;     |
| chr1  | 3176048   | 3176298   | 251         | 14.2;26.0;       | 22T;77T;     |
| chr1  | 55002896  | 55003056  | 161         | 69.9;85.2;47.2;  | 22T;77T;83T; |
| chr16 | 88349723  | 88349887  | 165         | 251.0;16.1;      | 22T;80T;     |
| chr17 | 41632758  | 41633278  | 521         | 85.2;91.8;       | 80T;83T;     |
| chr17 | 41632758  | 41633279  | 522         | 24.4;193.3;      | 24T;77T;     |
| chr17 | 41632779  | 41633279  | 501         | 24.5;85.4;       | 24T;80T;     |
| chr17 | 80024304  | 80024653  | 350         | 64.1;35.3;       | 77T;80T;     |
| chr19 | 38750196  | 38750320  | 125         | 33.3;8.2;        | 22T;24T;     |
| chr19 | 7331320   | 7331580   | 261         | 11.8;12.4;       | 22T;77T;     |
| chr20 | 63913065  | 63913104  | 40          | 35.5;98.3;       | 22T;80T;     |
| chr6  | 157238333 | 157238374 | 42          | 23.8;12.8;       | 22T;77T;     |

|      |           |           |      |               |          |
|------|-----------|-----------|------|---------------|----------|
| chr6 | 168270045 | 168270260 | 216  | 224.8;22.4;   | 22T;80T; |
| chr8 | 138691548 | 138692217 | 670  | 24.0;6.6;     | 77T;80T; |
| chr9 | 133254915 | 133255391 | 477  | 37.7;10.2;    | 22T;77T; |
| chr9 | 34681484  | 34681981  | 498  | 9.2;27.7;     | 28T;80T; |
| chrY | 10670733  | 10674059  | 3327 | 4008.5;366.2; | 24T;50T; |
| chrY | 10670742  | 10674059  | 3318 | 426.2;3961.2; | 80T;81T; |

**Supplementary Table S5: The most abundant circular DNA detected in each tissue sample.** Tab separated file containing the chromosomal coordinates and coverage statistics of the detected circular DNA. Ordered from left to right, the columns contain the following information: 1,chromosome; 2, start coordinate; 3, end coordinate; 4, number of discordant read pairs; 5, number of split reads; 6, mean coverage within the detected coordinates; 7, standard deviation of the coverage within the detected coordinates; 8, read coverage ratio at the start coordinate; 9, read coverage ratio at the end coordinates; 10, fraction of reference bases not covered by sequencing reads within the detection; 11, sample type.

| chr om | start     | end       | discor<br>dant<br>reads | soft-<br>clipping<br>reads | meanco<br>v | Standard<br>deviation | start_rati<br>o | end_rati<br>o | contin<br>uity | sample |
|--------|-----------|-----------|-------------------------|----------------------------|-------------|-----------------------|-----------------|---------------|----------------|--------|
| chr 11 | 66984160  | 66984581  | 11                      | 224                        | 403.2826603 | 46.9538957            | 0.950907778     | 0.974748731   | 0              | #22T   |
| chr 20 | 19370979  | 19371626  | 9                       | 230                        | 581.3802164 | 87.94501291           | 0.991171824     | 0.999377482   | 0              | #24T   |
| chr 16 | 46394458  | 46395066  | 14                      | 1381                       | 31045.99013 | 6985.011646           | 0.746902461     | 0.504681592   | 0              | #28T   |
| chr 3  | 197489467 | 197490186 | 6                       | 137                        | 535.7009736 | 105.9972099           | 0.993305751     | 0.998638385   | 0              | #50T   |
| chr 1  | 151229108 | 151229441 | 10                      | 199                        | 2195.912913 | 1220.466497           | 0.993774857     | 0.997315686   | 0              | #77T   |
| chr 8  | 69572734  | 69573332  | 9                       | 98                         | 97.86956522 | 7.641182437           | 0.922652901     | 0.941573756   | 0              | #80T   |
| chr 10 | 133177535 | 133177643 | 0                       | 74                         | 309.0555556 | 175.2498657           | 0.36929044      | 0.994470828   | 0              | #81T   |
| chr 1  | 64223186  | 64224111  | 14                      | 156                        | 301.8875676 | 49.38600641           | 0.990493732     | 0.999975026   | 0              | #83T   |
| chr 5  | 67581379  | 67581506  | 17                      | 119                        | 355         | 29.37083025           | 0.999972567     | 1             | 0              | #22NT  |
| chr X  | 49297885  | 49301592  | 26                      | 77                         | 363.3350418 | 147.8760954           | 0.599062381     | 0.99902167    | 0              | #24NT  |
| chr 3  | 184826499 | 184826923 | 3674                    | 10817                      | 27571.92217 | 3101.117478           | 0.999981388     | 0.999664445   | 0              | #28NT  |
| chr 17 | 2775872   | 2776198   | 22                      | 316                        | 488.1441718 | 40.16111051           | 0.967644048     | 0.98158548    | 0              | #50NT  |
| chr 17 | 47066267  | 47066301  | 0                       | 154                        | 1047.794118 | 25.95786111           | 0.947775886     | 0.947775886   | 0              | #77NT  |
| chr 19 | 52824741  | 52827890  | 5                       | 135                        | 571.269927  | 136.8402519           | 0.960918665     | 0.999965425   | 0              | #80NT  |
| chr 19 | 45239435  | 45242932  | 6                       | 192                        | 379.0729196 | 78.52213807           | 0.722775412     | 0.65510502    | 0              | #81NT  |
| chr 2  | 128454967 | 128455176 | 7                       | 117                        | 539.1196172 | 292.4763435           | 0.290904385     | 0.979230029   | 0              | #83NT  |

**Supplementary Table S6: Genes that harbored eccDNA in at least three tumor samples.** Tab separated file containing the chromosomal coordinates and coverage statistics of the detected circular DNA. Ordered from left to right, the columns contain the following information: 1, gene name; 2, chromosome; 3, start coordinate; 4, end coordinate; 5, number of discordant read pairs; 6, number of split reads; 7, sample type.

| Gene  | chrom | start     | end       | discordant<br>reads | soft-<br>clipping<br>reads | sample |
|-------|-------|-----------|-----------|---------------------|----------------------------|--------|
| LAMB3 | chr1  | 209643261 | 209643707 | 14                  | 20                         | #22T   |
|       | chr1  | 209637186 | 209637667 | 4                   | 12                         | #28T   |

|          |       |           |           |    |    |      |
|----------|-------|-----------|-----------|----|----|------|
|          | chr1  | 209638820 | 209640218 | 16 | 71 | #77T |
| NTAQ1    | chr8  | 123435750 | 123435908 | 4  | 46 | #22T |
|          | chr8  | 123443276 | 123443776 | 0  | 8  | #28T |
|          | chr8  | 123459114 | 123459597 | 11 | 18 | #77T |
| PAK3     | chrX  | 110947727 | 110949064 | 1  | 2  | #22T |
|          | chrX  | 111106295 | 111106523 | 0  | 6  | #28T |
|          | chrX  | 111130645 | 111131726 | 0  | 8  | #77T |
|          | chrX  | 111140649 | 111143250 | 0  | 2  | #80T |
| RHEX     | chr1  | 206095741 | 206095922 | 0  | 2  | #22T |
|          | chr1  | 206074135 | 206074414 | 0  | 80 | #28T |
|          | chr1  | 206076416 | 206077499 | 0  | 9  | #28T |
|          | chr1  | 206070187 | 206070476 | 9  | 61 | #77T |
| VWF      | chr22 | 5949639   | 5950614   | 0  | 6  | #22T |
|          | chr22 | 6066228   | 6066586   | 1  | 8  | #22T |
|          | chr22 | 6056612   | 6056754   | 0  | 7  | #50T |
|          | chr22 | 6052132   | 6053607   | 2  | 4  | #80T |
| SLC16A3  | chr17 | 82252370  | 82252758  | 0  | 2  | #22T |
|          | chr17 | 82242979  | 82243702  | 0  | 4  | #28T |
|          | chr17 | 82245355  | 82245926  | 0  | 3  | #28T |
|          | chr17 | 82260371  | 82262910  | 0  | 2  | #77T |
| BAIAP2L2 | chr22 | 38091157  | 38091552  | 8  | 56 | #28T |
|          | chr22 | 38101323  | 38105290  | 0  | 4  | #80T |
|          | chr22 | 38099051  | 38099303  | 4  | 6  | #83T |
| DIO2     | chr14 | 80224449  | 80224797  | 12 | 17 | #28T |
|          | chr14 | 80308770  | 80309965  | 8  | 32 | #77T |
|          | chr14 | 80336413  | 80337072  | 0  | 6  | #80T |
| GPC3     | chrX  | 133784231 | 133784513 | 0  | 7  | #28T |
|          | chrX  | 133800579 | 133800769 | 0  | 4  | #28T |
|          | chrX  | 133634340 | 133638589 | 14 | 43 | #77T |
|          | chrX  | 133858277 | 133859028 | 24 | 4  | #77T |
|          | chrX  | 133858278 | 133859028 | 18 | 22 | #80T |
| SGIP1    | chr1  | 66700048  | 66700341  | 0  | 2  | #28T |
|          | chr1  | 66726736  | 66728212  | 0  | 4  | #77T |
|          | chr1  | 66552874  | 66553703  | 4  | 2  | #80T |
|          | chr1  | 66647568  | 66650015  | 9  | 19 | #80T |
| SULF1    | chr8  | 69556469  | 69556562  | 4  | 5  | #28T |
|          | chr8  | 69556470  | 69556562  | 0  | 23 | #28T |
|          | chr8  | 69596154  | 69596464  | 0  | 79 | #28T |
|          | chr8  | 69584303  | 69585219  | 0  | 2  | #77T |
|          | chr8  | 69572734  | 69573332  | 9  | 98 | #80T |

**Supplementary TableS7: EccDNAs containing lncRNAs and miRNAs detected in the samples.**

| chrom | start     | end       | discordant reads | soft-clipping reads | Sample | Cene_start | Cene_end  | Gene_information                                              |
|-------|-----------|-----------|------------------|---------------------|--------|------------|-----------|---------------------------------------------------------------|
| chr1  | 109595947 | 109598302 | 2                | 2                   | 22NT   | 109596225  | 109597781 | ID=ENSG00000225113.1;gene_type=lncRNA;gene_name=RP5-1160K1.3  |
| chr17 | 28360592  | 28360790  | 0                | 13                  | 22NT   | 28360654   | 28360734  | ID=ENSG00000284532.1;gene_type=miRNA;gene_name=MIR4723        |
| chr2  | 202336371 | 202338639 | 1                | 3                   | 22NT   | 202336739  | 202337200 | ID=ENSG00000272966.1;gene_type=lncRNA;gene_name=RP11-686O6.1  |
| chr8  | 22244913  | 22245377  | 0                | 4                   | 22NT   | 22244962   | 22245043  | ID=ENSG00000208037.1;gene_type=miRNA;gene_name=MIR320A        |
| chr1  | 26554115  | 26556031  | 2                | 4                   | 22T    | 26554542   | 26554593  | ID=ENSG00000238705.1;gene_type=miRNA;gene_name=MIR1976        |
| chr12 | 125149347 | 125172015 | 4                | 11                  | 22T    | 125150058  | 125151394 | ID=ENSG00000256814.1;gene_type=lncRNA;gene_name=RP11-158L12.5 |
| chr12 | 125149347 | 125172015 | 4                | 11                  | 22T    | 125159331  | 125160397 | ID=ENSG00000287240.1;gene_type=lncRNA;gene_name=RP11-158L12.8 |
| chr14 | 105616348 | 105760979 | 9                | 15                  | 22T    | 105621116  | 105621180 | ID=ENSG00000274172.1;gene_type=miRNA;gene_name=MIR8071-1      |
| chr14 | 105616348 | 105760979 | 9                | 15                  | 22T    | 105640168  | 105640232 | ID=ENSG00000277030.1;gene_type=miRNA;gene_name=MIR8071-2      |
| chr14 | 105616348 | 105760979 | 9                | 15                  | 22T    | 105647924  | 105649057 | ID=ENSG00000253364.2;gene_type=lncRNA;gene_name=COPDA1        |
| chr19 | 41220696  | 41222077  | 2                | 8                   | 22T    | 41221426   | 41222051  | ID=ENSG00000269652.1;gene_type=lncRNA;gene_name=CTD-2195B23.3 |
| chr19 | 10779444  | 10785208  | 0                | 2                   | 22T    | 10780254   | 10780335  | ID=ENSG00000265879.1;gene_type=miRNA;gene_name=MIR4748        |
| chr19 | 41398633  | 41403844  | 0                | 2                   | 22T    | 41399372   | 41400365  | ID=ENSG00000266987.1;gene_type=lncRNA;gene_name=CTC-435M10.10 |
| chr19 | 35257537  | 35266647  | 0                | 2                   | 22T    | 35262846   | 35264804  | ID=ENSG00000268947.1;gene_type=lncRNA;gene_name=AD000684.2    |
| chr8  | 27433295  | 27433823  | 4                | 10                  | 22T    | 27433370   | 27433434  | ID=ENSG00000273836.1;gene_type=miRNA;gene_name=MIR6842        |
| chr9  | 21995422  | 21997233  | 3                | 4                   | 22T    | 21995482   | 21996013  | ID=ENSG00000266446.1;gene_type=lncRNA;gene_name=RP11-149I2.4  |
| chr19 | 45436126  | 45437170  | 1                | 2                   | 24T    | 45436654   | 45436704  | ID=ENSG00000275726.1;gene_type=miRNA;gene_name=MIR6088        |
| chr19 | 45436367  | 45437014  | 0                | 4                   | 24T    | 45436654   | 45436704  | ID=ENSG00000275726.1;gene_type=miRNA;gene_name=MIR6088        |
| chr14 | 95183293  | 95189156  | 4                | 15                  | 77NT   | 95185117   | 95185854  | ID=ENSG00000259143.1;gene_type=lncRNA;gene_name=CTD-2240H23.2 |
| chr17 | 8317025   | 8319538   | 0                | 4                   | 77NT   | 8318088    | 8318712   | ID=ENSG00000226871.1;gene_type=lncRNA;gene_name=AC135178.7    |
| chr1  | 174021216 | 174023028 | 2                | 3                   | 77T    | 174022509  | 174022985 | ID=ENSG00000224977.1;gene_type=lncRNA;gene_name=LINC02776     |
| chr10 | 102432869 | 102437760 | 6                | 22                  | 77T    | 102436512  | 102436584 | ID=ENSG00000202569.4;gene_type=miRNA;gene_name=MIR146B        |
| chr15 | 78298920  | 78300072  | 0                | 5                   | 77T    | 78299701   | 78299924  | ID=ENSG00000277482.1;gene_type=lncRNA;gene_name=RP11-762H8.5  |
| chr19 | 53751436  | 53753268  | 0                | 2                   | 77T    | 53752397   | 53752481  | ID=ENSG00000207992.1;gene_type=miRNA;gene_name=MIR519A1       |
| chr4  | 146407661 | 146409488 | 0                | 5                   | 77T    | 146408583  | 146408688 | ID=ENSG00000278438.1;gene_type=miRNA;gene_name=MIR7849        |
| chr2  | 27061755  | 27062974  | 6                | 2                   | 80NT   | 27062428   | 27062907  | ID=ENSG00000272148.1;gene_type=lncRNA;gene_name=RP11-195B17.1 |
| chr21 | 41580435  | 41583373  | 6                | 38                  | 80NT   | 41580475   | 41582887  | ID=ENSG00000286027.1;gene_type=lncRNA;gene_name=PCSEAT        |
| chr7  | 71305736  | 71309221  | 10               | 24                  | 80NT   | 71307672   | 71307770  | ID=ENSG00000265878.2;gene_type=miRNA;gene_name=MIR3914-1      |
| chr7  | 71305736  | 71309221  | 10               | 24                  | 80NT   | 71307674   | 71307768  | ID=ENSG00000283278.1;gene_type=miRNA;gene_name=MIR3914-2      |
| chr9  | 40928332  | 40929259  | 8                | 32                  | 80NT   | 40929010   | 40929092  | ID=ENSG00000275377.1;gene_type=miRNA;gene_name=MIR1299        |

|       |           |           |    |    |      |           |           |                                                               |
|-------|-----------|-----------|----|----|------|-----------|-----------|---------------------------------------------------------------|
| chr1  | 53265800  | 53272874  | 0  | 2  | 80T  | 53267935  | 53268601  | ID=ENSG00000234578.1;gene_type=lncRNA;gene_name=RP4-784A16.1  |
| chr10 | 3832337   | 3835925   | 0  | 2  | 80T  | 3833950   | 3834728   | ID=ENSG00000230573.1;gene_type=lncRNA;gene_name=LINC02639     |
| chr13 | 106504829 | 106506815 | 0  | 2  | 80T  | 106506046 | 106506713 | ID=ENSG00000274204.1;gene_type=lncRNA;gene_name=RP11-272L14.2 |
| chr15 | 98282055  | 98286736  | 0  | 3  | 80T  | 98282075  | 98285907  | ID=ENSG00000259041.1;gene_type=lncRNA;gene_name=RP11-167B3.1  |
| chr15 | 100887654 | 100890127 | 0  | 14 | 80T  | 100888472 | 100889106 | ID=ENSG00000278456.1;gene_type=lncRNA;gene_name=RP11-66B24.9  |
| chr17 | 28373141  | 28373578  | 0  | 16 | 80T  | 28373256  | 28373562  | ID=ENSG00000277450.1;gene_type=lncRNA;gene_name=CTB-96E2.10   |
| chr17 | 45396357  | 45399680  | 2  | 10 | 80T  | 45396932  | 45397477  | ID=ENSG00000267344.1;gene_type=lncRNA;gene_name=CTB-39G8.3    |
| chr17 | 59365275  | 59367020  | 0  | 2  | 80T  | 59366083  | 59366154  | ID=ENSG00000263857.1;gene_type=miRNA;gene_name=MIR4729        |
| chr18 | 79702231  | 79706460  | 1  | 6  | 80T  | 79702721  | 79703651  | ID=ENSG00000266901.1;gene_type=lncRNA;gene_name=RP11-567M16.5 |
| chr2  | 113823606 | 113831647 | 6  | 22 | 80T  | 113829390 | 113831119 | ID=ENSG00000244063.1;gene_type=lncRNA;gene_name=AC024704.2    |
| chr2  | 231892199 | 231893277 | 1  | 4  | 80T  | 231892242 | 231892298 | ID=ENSG00000222246.1;gene_type=miRNA;gene_name=MIR1471        |
| chr2  | 241844358 | 241846078 | 4  | 2  | 80T  | 241844380 | 241845036 | ID=ENSG00000235151.1;gene_type=lncRNA;gene_name=AC114730.2    |
| chr20 | 10997842  | 11002402  | 0  | 2  | 80T  | 11001304  | 11001763  | ID=ENSG00000270777.1;gene_type=lncRNA;gene_name=RP11-103J8.2  |
| chr22 | 30731362  | 30732037  | 2  | 16 | 80T  | 30731557  | 30731641  | ID=ENSG00000264661.3;gene_type=miRNA;gene_name=MIR3200        |
| chr22 | 48270763  | 48275784  | 8  | 6  | 80T  | 48274364  | 48274415  | ID=ENSG00000266508.1;gene_type=miRNA;gene_name=MIR3201        |
| chr3  | 194127063 | 194131864 | 0  | 4  | 80T  | 194130616 | 194131201 | ID=ENSG00000232874.1;gene_type=lncRNA;gene_name=RP11-135A1.2  |
| chr6  | 169724977 | 169726903 | 0  | 6  | 80T  | 169725091 | 169725854 | ID=ENSG00000232640.1;gene_type=lncRNA;gene_name=RP1-266L20.2  |
| chr6  | 42921691  | 42934324  | 0  | 2  | 80T  | 42928287  | 42929457  | ID=ENSG00000287825.1;gene_type=lncRNA;gene_name=RP3-475N16.9  |
| chr8  | 56220648  | 56226976  | 3  | 7  | 80T  | 56222688  | 56223173  | ID=ENSG00000272343.1;gene_type=lncRNA;gene_name=RP11-140I16.3 |
| chr1  | 24959521  | 24965572  | 4  | 2  | 81NT | 24961345  | 24963097  | ID=ENSG00000229162.1;gene_type=lncRNA;gene_name=RUNX3-AS1     |
| chr1  | 2325727   | 2330894   | 6  | 14 | 81NT | 2326201   | 2326693   | ID=ENSG00000272161.1;gene_type=lncRNA;gene_name=RP4-713A8.1   |
| chr11 | 115528569 | 115533475 | 5  | 32 | 81NT | 115532322 | 115532953 | ID=ENSG00000256281.1;gene_type=lncRNA;gene_name=RP11-136I14.2 |
| chr12 | 48993774  | 48996423  | 2  | 2  | 81NT | 48995150  | 48996334  | ID=ENSG00000258283.1;gene_type=lncRNA;gene_name=RP11-386G11.3 |
| chr17 | 38824473  | 38827671  | 0  | 2  | 81NT | 38825838  | 38825892  | ID=ENSG00000274054.1;gene_type=miRNA;gene_name=MIR4727        |
| chr19 | 9720215   | 9722707   | 0  | 3  | 81NT | 9721903   | 9722410   | ID=ENSG00000277587.1;gene_type=lncRNA;gene_name=CTD-3116E22.8 |
| chr20 | 63727249  | 63730493  | 2  | 2  | 81NT | 63730072  | 63730377  | ID=ENSG00000274501.1;gene_type=lncRNA;gene_name=RP4-583P15.16 |
| chr20 | 63727250  | 63730511  | 2  | 4  | 81NT | 63730072  | 63730377  | ID=ENSG00000274501.1;gene_type=lncRNA;gene_name=RP4-583P15.16 |
| chr5  | 173346158 | 173349727 | 20 | 31 | 81NT | 173347455 | 173347536 | ID=ENSG00000274994.1;gene_type=miRNA;gene_name=MIR8056        |
| chr5  | 1305213   | 1311059   | 3  | 2  | 81NT | 1309310   | 1309377   | ID=ENSG00000263670.1;gene_type=miRNA;gene_name=MIR4457        |
| chr9  | 128595595 | 128597711 | 7  | 29 | 81NT | 128595893 | 128596633 | ID=ENSG00000280474.1;gene_type=lncRNA;gene_name=RP11-216B9.8  |
| chr1  | 162036144 | 162040922 | 12 | 23 | 83NT | 162039016 | 162039567 | ID=ENSG00000227818.1;gene_type=lncRNA;gene_name=RP11-227F8.2  |
| chr15 | 94598868  | 94601165  | 0  | 2  | 83NT | 94600014  | 94600821  | ID=ENSG00000259331.1;gene_type=lncRNA;gene_name=RP11-57P19.1  |
| chr19 | 18567689  | 18570023  | 0  | 2  | 83NT | 18568506  | 18569375  | ID=ENSG00000268983.1;gene_type=lncRNA;gene_name=AC005253.4    |
| chr2  | 45011216  | 45017588  | 11 | 8  | 83NT | 45013214  | 45013668  | ID=ENSG00000231156.1;gene_type=lncRNA;gene_name=AC093702.1    |

|           |           |    |    |      |           |           |                                                               |
|-----------|-----------|----|----|------|-----------|-----------|---------------------------------------------------------------|
| 41865555  | 41873239  | 12 | 19 | 83NT | 41870633  | 41872054  | ID=ENSG00000236545.1;gene_type=lncRNA;gene_name=AP001619.3    |
| 77697931  | 77698197  | 0  | 6  | 28NT | 77698012  | 77698116  | ID=ENSG00000266325.1;gene_type=miRNA;gene_name=MIR3665        |
| 31704618  | 31705437  | 3  | 86 | 28NT | 31704728  | 31705260  | ID=ENSG00000276867.1;gene_type=lncRNA;gene_name=CTD-2358C21.5 |
| 3960913   | 3961814   | 0  | 35 | 28NT | 3961414   | 3961512   | ID=ENSG00000283928.1;gene_type=miRNA;gene_name=MIR637         |
| 88745417  | 88746031  | 0  | 10 | 28NT | 88745836  | 88745905  | ID=ENSG00000265873.1;gene_type=miRNA;gene_name=MIR4289        |
| 155396006 | 155398176 | 8  | 4  | 28T  | 155396010 | 155396978 | ID=ENSG00000227773.1;gene_type=lncRNA;gene_name=ASH1L-IT1     |
| 60478066  | 60478335  | 0  | 17 | 28T  | 60478111  | 60478181  | ID=ENSG00000266140.1;gene_type=miRNA;gene_name=MIR4533        |
| 535776    | 535914    | 4  | 14 | 28T  | 535840    | 535882    | ID=ENSG00000264233.1;gene_type=miRNA;gene_name=MIR4456        |
| 21470864  | 21471181  | 4  | 8  | 28T  | 21471058  | 21471146  | ID=ENSG00000221783.1;gene_type=miRNA;gene_name=MIR1183        |
| 177029263 | 177029901 | 0  | 14 | 50NT | 177029363 | 177029445 | ID=ENSG00000202609.4;gene_type=miRNA;gene_name=MIR488         |
| 109833236 | 109833474 | 0  | 4  | 50T  | 109833348 | 109833436 | ID=ENSG00000263510.1;gene_type=miRNA;gene_name=MIR4497        |

|       |
|-------|
| chr21 |
| chr13 |
| chr16 |
| chr19 |
| chr9  |
| chr1  |
| chr20 |
| chr5  |
| chr7  |
| chr1  |
| chr12 |
